# Supplementary material for: Lavandula austroapennina (Lamiaceae): Getting Insights into Bioactive Polyphenols of a Rare Italian Endemic Vascular Plant
Source: MDPI journal article supplement (doi:10.3390/ijms24098038), 2023-04-28
Supplement: s1 [file s1]

# *Lavandula austroapennina* (Lamiaceae): Getting Insights into Bioactive Polyphenols of a Rare Italian Endemic Vascular Plant

## Supplementary Materials:

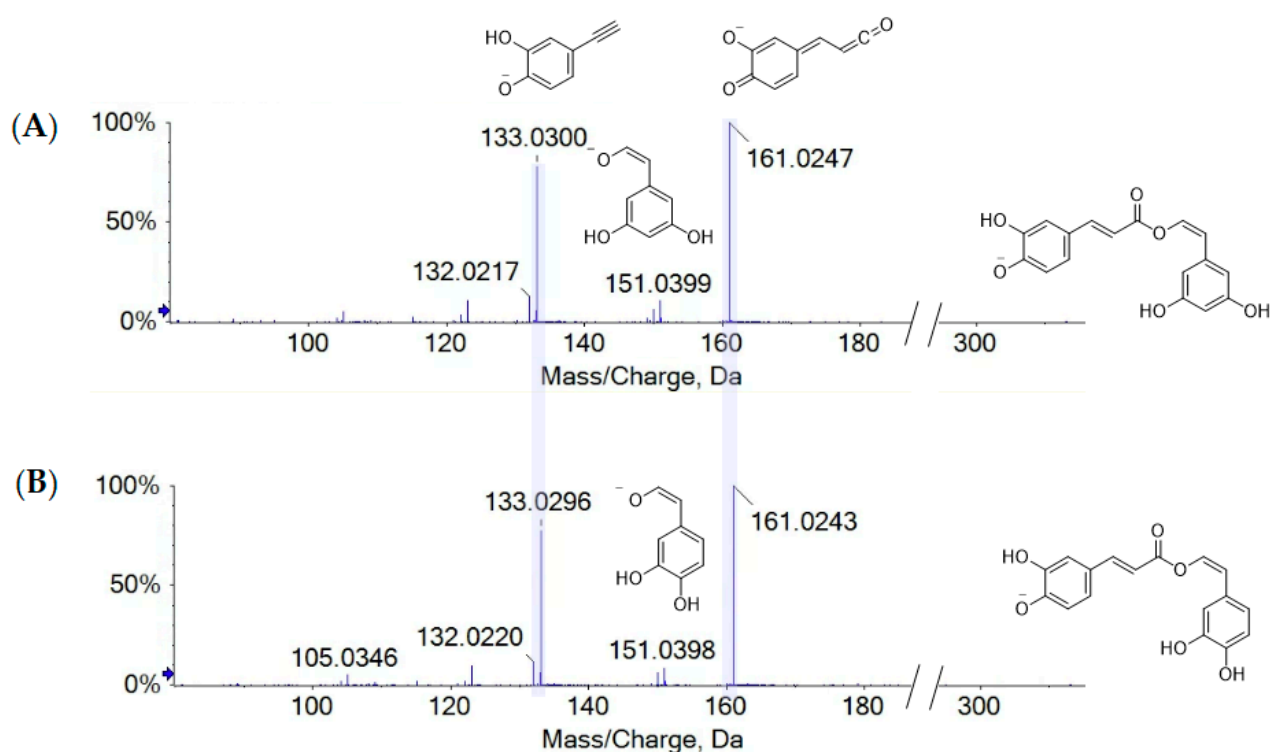

**Figure S1.** TOF-MS/MS spectra of compound 61 (A) and 63 (B).

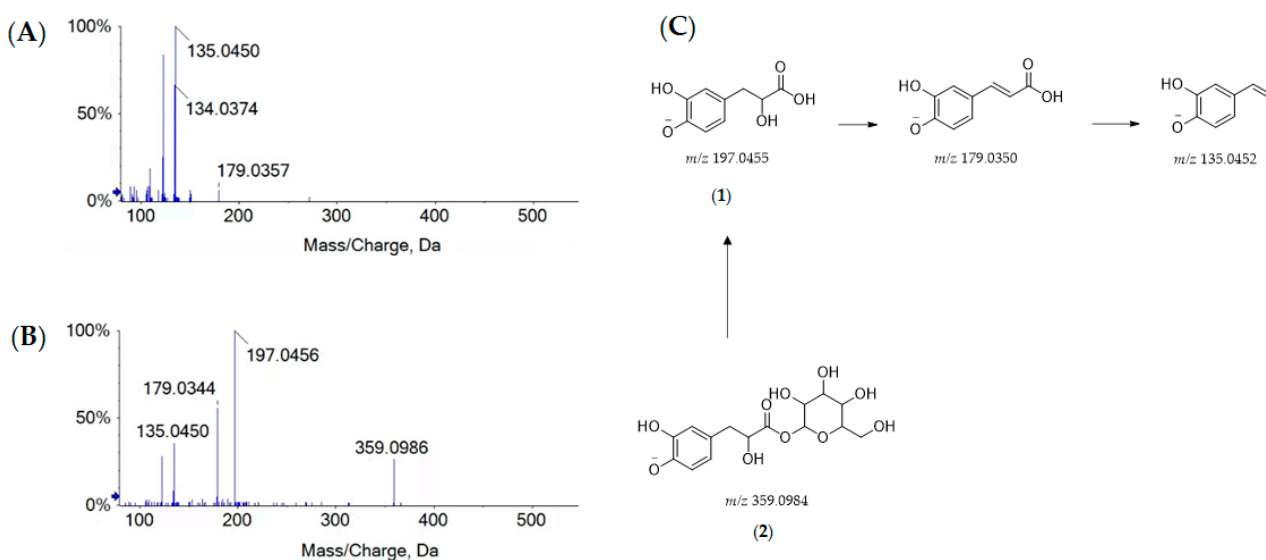

**Figure S2.** TOF-MS/MS spectra of compound 1 (A) and 2 (B) and their hypothetical fragmentation (C). Theoretical  $m/z$  values are reported below each structure.

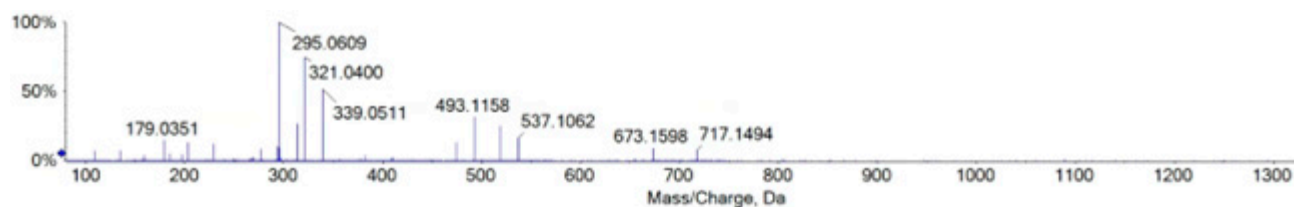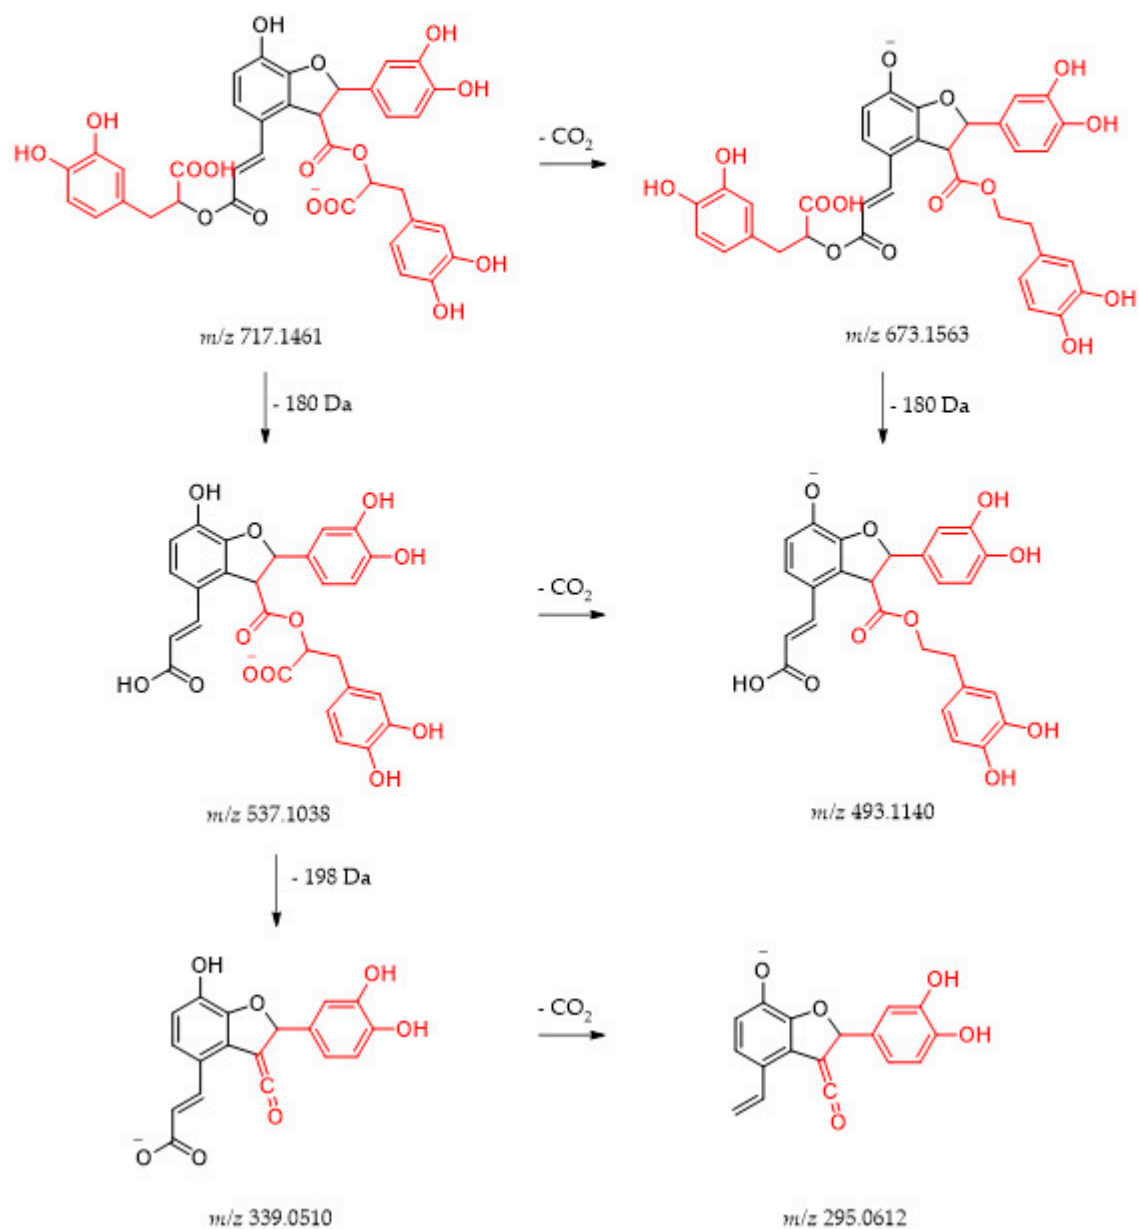

**Figure S3.** TOF-MS/MS spectrum of salvianolic acid B (43) and its hypothesized fragmentation pathway (the three danshensu units are highlighted in red color). Theoretical  $m/z$  values are reported below each structure.

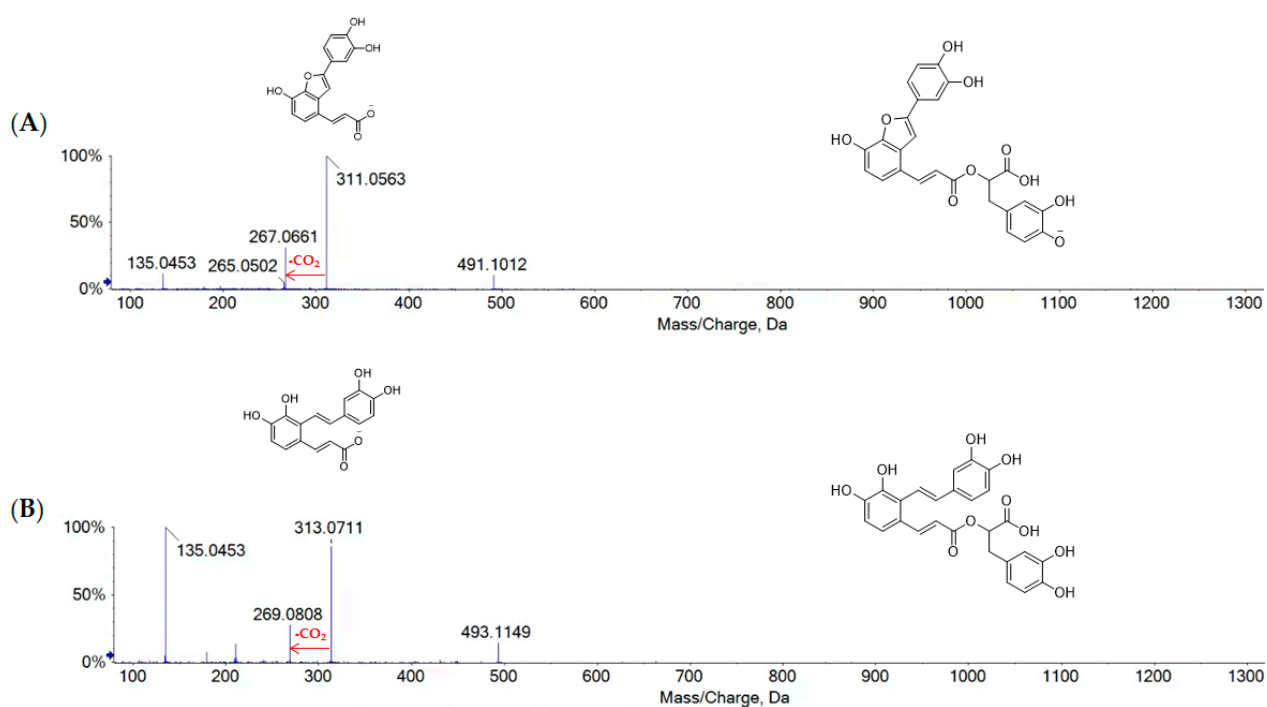

**Figure S4.** TOF-MS/MS spectra of compounds identified as (A) salvianolic acid C (57) and (B) salvianolic acid A (67).

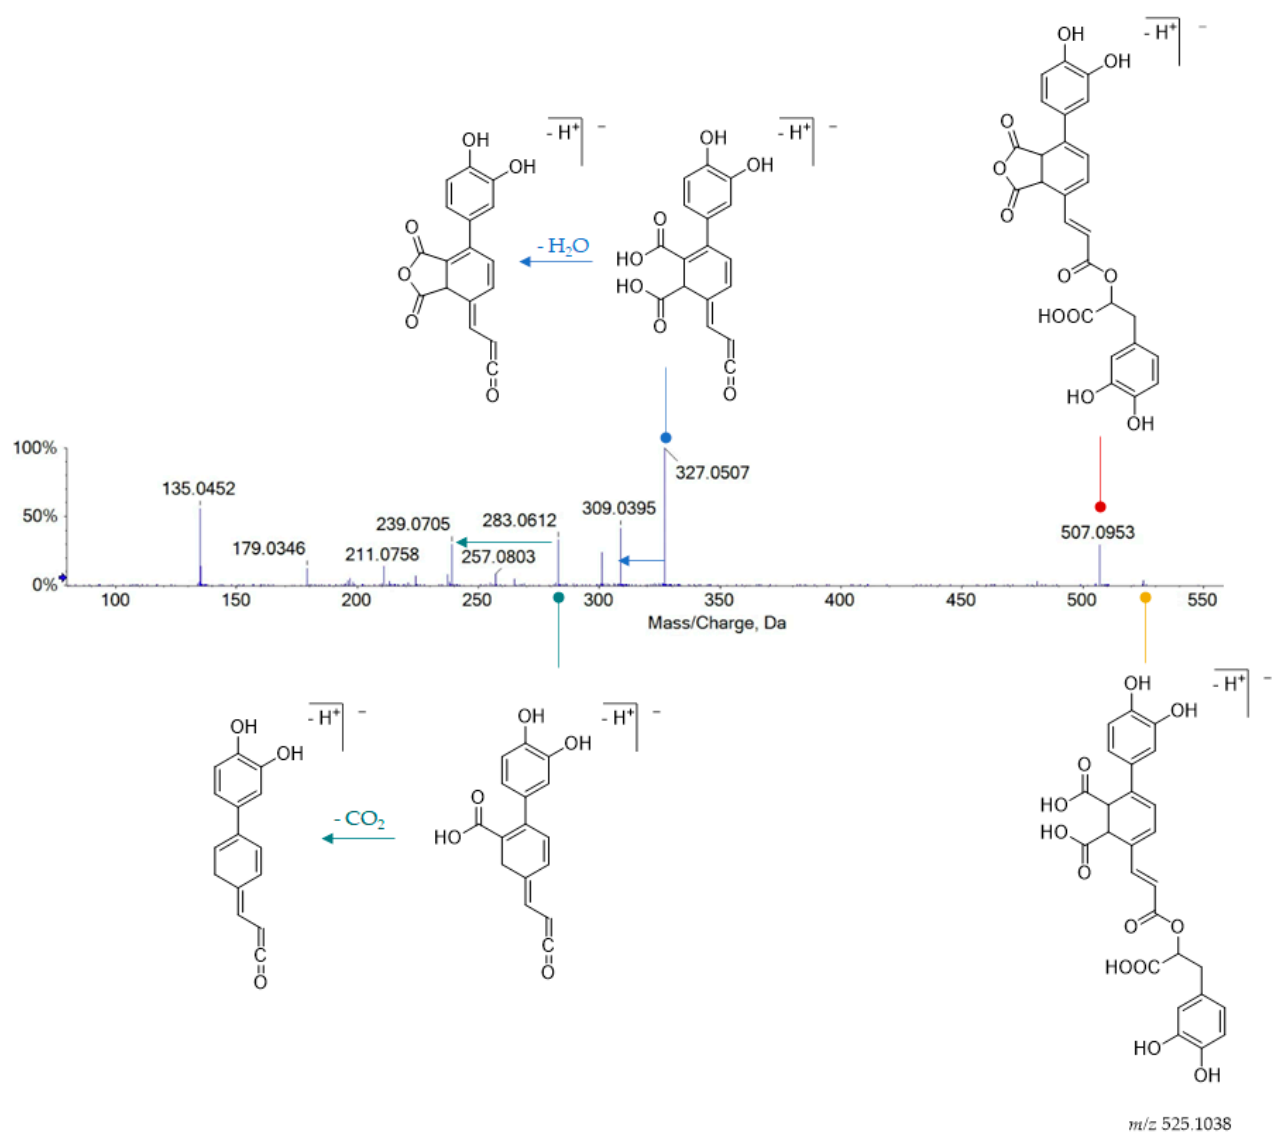

**Figure S5.** TOF-MS/MS spectrum of compound 48. The hypothesized pivotal structures are also reported.

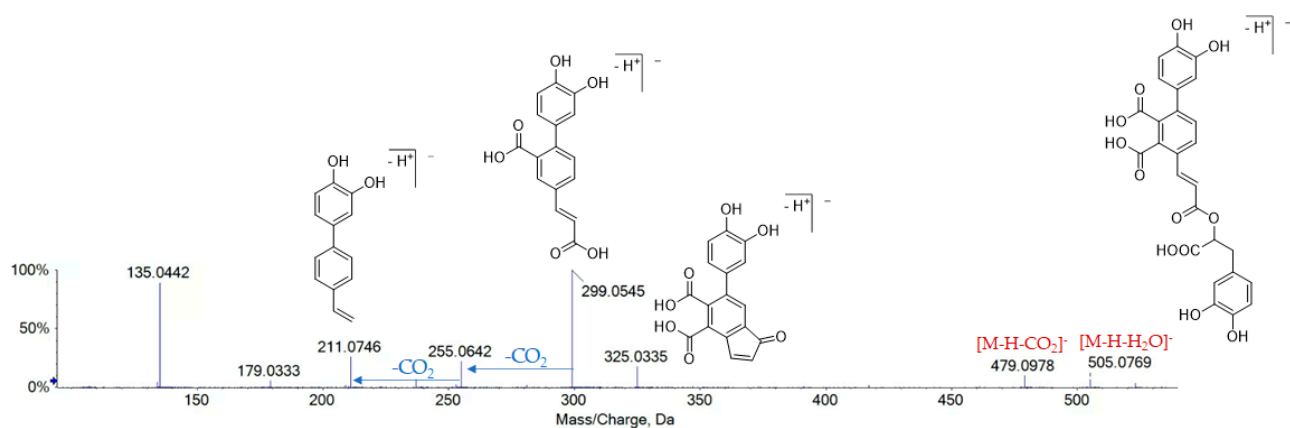

**Figure S6.** TOF-MS/MS spectrum of compound 53. The hypothesized pivotal structures are also reported.

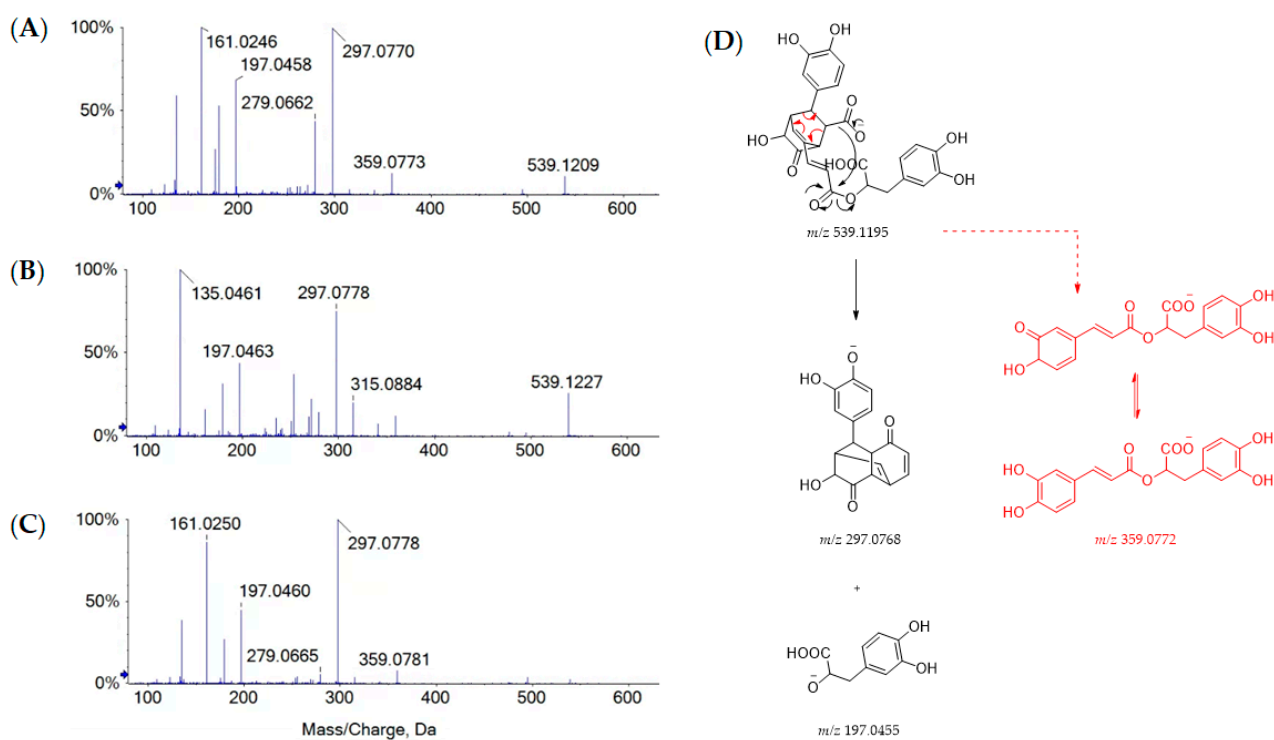

**Figure S7.** TOF-MS/MS spectra of compounds 30 (A), 31 (B), and 36 (C). The hypothesized pivotal structures are reported (D). Theoretical  $m/z$  values are reported below each structure.

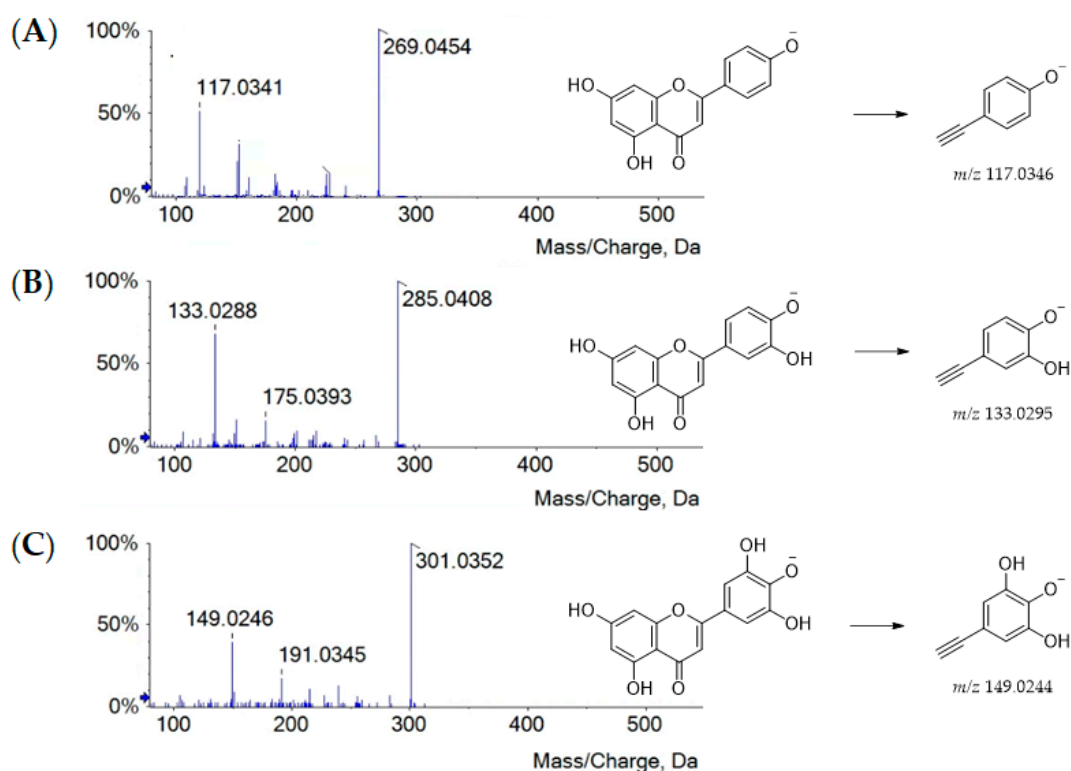

**Figure S8.** TOF-MS/MS spectra of compounds 60 (A), 56 (B), and 50 (C). The hypothesized pivotal structures are reported. Theoretical  $m/z$  values are reported below each structure.

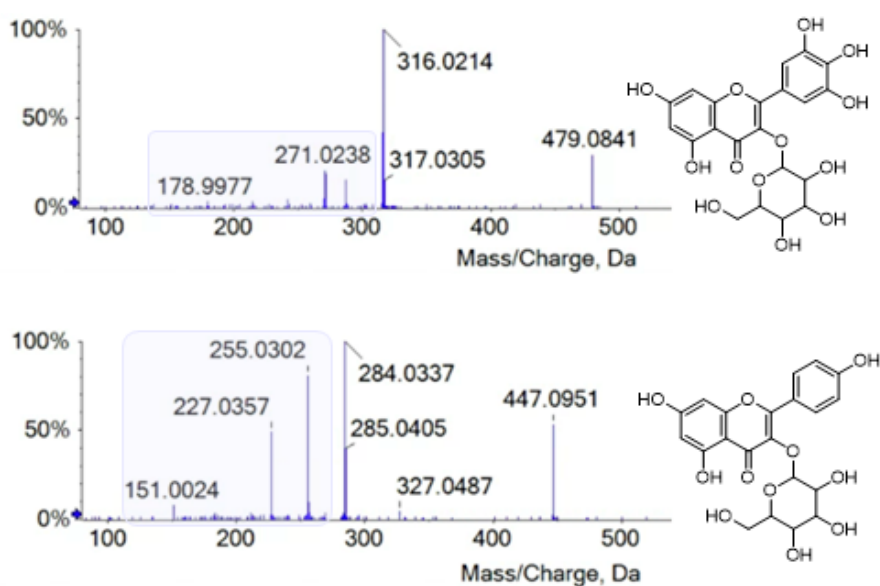

**Figure S9.** TOF-MS/MS spectra of compounds 24 (at  $m/z$  479.0841) and 42 (at  $m/z$  447.0951). Coloured boxes denote pivotal ions for flavonol skeleton identification.

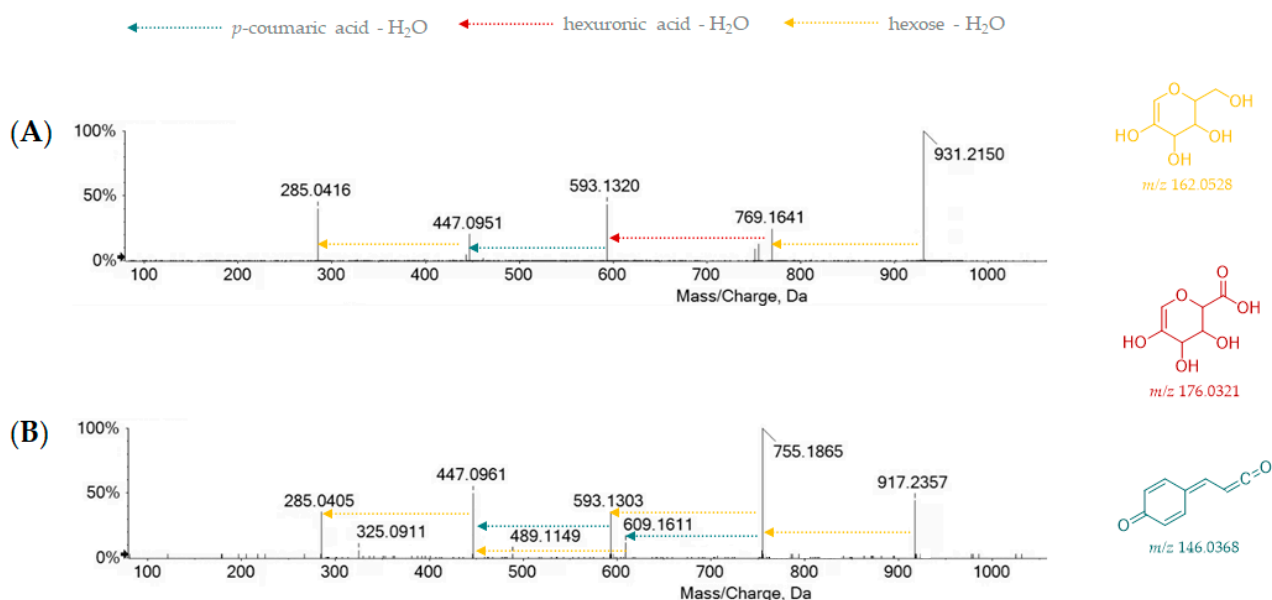

**Figure S10.** TOF-MS/MS spectra of compounds **46** (A), **49** (B). Colored arrows highlight the different building blocks of the saccharidic units, sequentially lost as neutral dehydrated form.

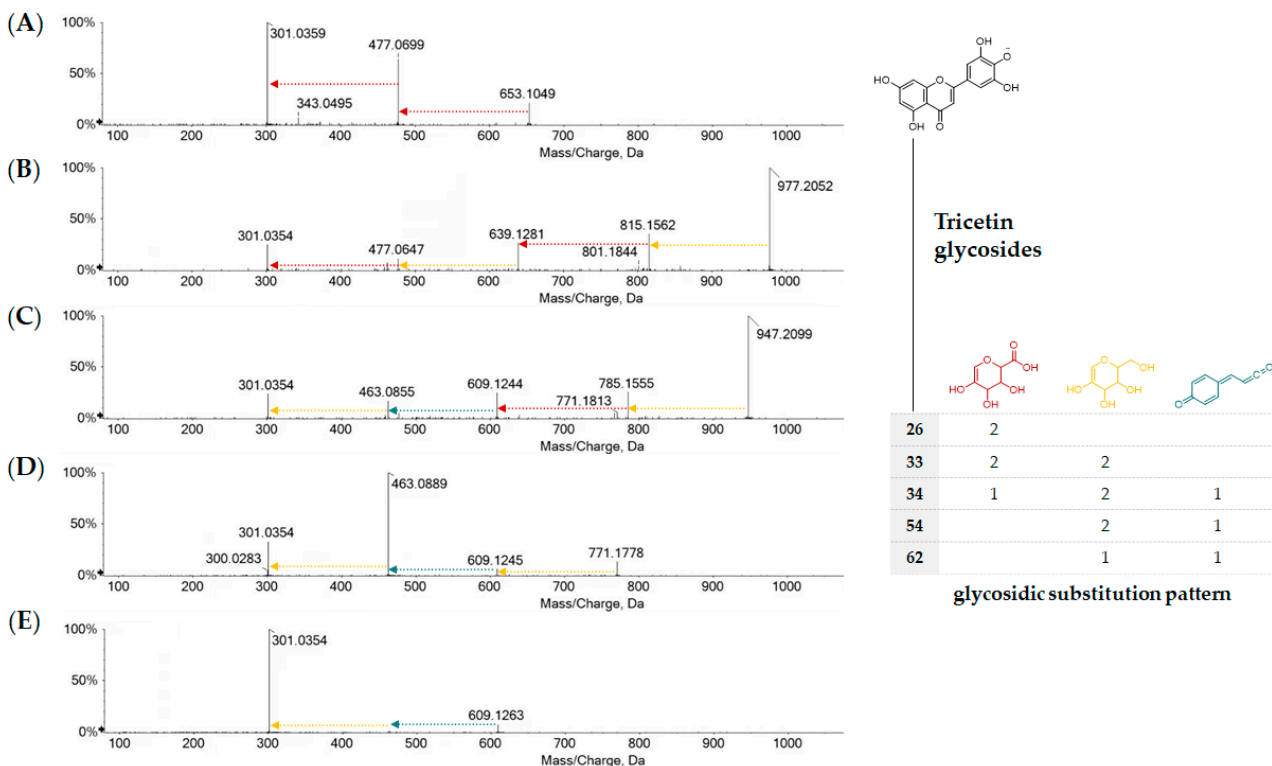

**Figure S11.** TOF-MS/MS spectra of compounds **26** (A), **33** (B), **34** (C), **54** (D), and **62** (E). A schematic representation of the glycosidic substitution pattern is also reported.
